# Supplementary material for: High-throughput mapping of the promoters of the mouse olfactory receptor genes reveals a new type of mammalian promoter and provides insight into olfactory receptor gene regulation
Source: HighWire-hosted journal article supplement (doi:10.1101/gr.120162.110), 2011-06-24
Supplement: Supplement.pdf [file Supplement.pdf]

Supporting Online Information

- 1) Supplemental Methods
- 2) **Figure S1** Schematic of RLM-RACE method used for promoter mapping
- 3) **Figure S2** Percent GC distribution of functional gene categories.
- 4) **Figure S3** Weak zonal promoter models based on TFBS.
- 5) **Figure S4:** Word-based clustering model of promoter relatedness.
- 6) **Table S1.** Gene families enriched in AT-rich promoters.
- 7) **Table S2.** Size of gene families of interest in mouse, human and zebrafish.
- 8) **Table S3.** Numbers of Olfr and non-Olfr promoters fitting model
- 9) **Table S4** Genomatix TFBS differentially enriched in Type I and Type II OR promoters
- 10) **Table S5** TFBS enrichment in most and least expressed OR promoters
- 11) Supplemental References

For:

**High-throughput mapping of the promoters of the mouse olfactory receptor genes reveals a new type of mammalian promoters**

E. Josephine Clowney<sup>1</sup>, Angeliki Magklara<sup>2</sup>, Bradley M. Colquitt<sup>3</sup>, Nidhi Pathak<sup>4</sup>, Robert, P., Lane<sup>4</sup> and Stavros Lomvardas<sup>1,2,3\*</sup>

<sup>1</sup>Program in Biomedical Sciences, University of California, San Francisco, CA 94158, USA.

<sup>2</sup>Department of Anatomy, University of California, San Francisco, CA 94158, USA.

<sup>3</sup>Program in Neurosciences, University of California, San Francisco, CA 94158, USA.

<sup>4</sup>Department of Molecular Biology and Biochemistry, Wesleyan University, Middletown CT, 06457, USA.

\*Corresponding Author. Email: stavros.lomvardas@ucsf.edu: T (415)514-4811; F (415)476-1974

## Supplemental Methods

**PRIMER SEQUENCES FOR RLM-RACE**

| Primer Name  | IUB Sequence                         |
|--------------|--------------------------------------|
| 135R (TMIII) | CADATHGCHACRTAHWTRTCRTAHGCCATGGATCCG |
| 214 (TMV)    | GRTADATRAAIGGRTTIARCATNGG            |
| b6 (TMVII)   | GSWISWICCIACRAARAARTAIATRAAIGGRTT    |
| P8 (TMVII)   | RTTICKIARISWRTAIATRAAIGGRTT          |
| P26R (TMIII) | CAIATIGCIACRTAICGRTCRTAIGC           |
| P27 (TMVI)   | ACIACIGAIAGRTGIGAISCRCAIGT           |

**FIGURE 2 CATEGORIZATIONS**

In figure 2C, promoters  $\leq 40\%$ GC or  $\geq 65\%$  GC were selected. 40% was chosen as the lower cutoff to include 75% of OR genes; 65% was chosen for the upper cutoff so as to include similar numbers of genes (~2000) in each category. Duplicates were removed from each list and all annotations for each gene were collected from DAVID, UCSC, MGI, and Weitzmann GeneCards (Bult et al. 2010; Huang et al. 2009; Kent et al. 2002; Safran et al. 2002). Each gene was assigned exclusively to one category amongst those listed below; assignment was hierarchical such that proteins fitting more than one category were assigned preferentially to starred groups. Percentage of the AT- or GC-rich promoters with each function (except those marked by an ampersand below) was then plotted. To assess statistical significance, we added the AT and GC categories together, counted total occurrences of each function, calculated an expected number in AT and GC based on hypothetical random distribution around the murine AT/GC

composition midpoint, and compared these values to the actual findings. The “Cellular Metabolism” functions accounted for 8% of GC-rich and 1.5% of AT-rich promoters; the “Transport” functions accounted for 12% of GC-rich and 2.5% of AT-rich promoters.

|                                             |                                                                                       |
|---------------------------------------------|---------------------------------------------------------------------------------------|
| *Chemosensation                             | GPCRs sensing foreign compounds                                                       |
| *Barriers and Immunity                      | Secreted and transmembrane proteins with immune function or forming barrier epithelia |
| *Xenobiotic Metabolism                      | Primary metabolism of foreign substances                                              |
| *Nuclear Process                            | All nuclear proteins                                                                  |
| Signal Transduction, Cell Cycle, Morphogens | All signaling compounds not contained in above categories                             |
| &Cellular Metabolism and Synthesis          | Non-xenobiotic metabolism, energy production, and non-nuclear macromolecule synthesis |
| &Transport, Structure, and Motility         | Transport organelles, cilia and flagella, cytoskeleton                                |
| &Miscellaneous                              |                                                                                       |
| &Unknown                                    |                                                                                       |

For Figure 2D and S1, existing KEGG (Xenobiotic Metabolism by Cytochrome p450) and GO (Transcription Factor Activity, Cell Cycle) categories were used when possible (Kanehisa and Goto 2000; Ashburner et al. 2000). When no existing category captured a function of interest (Chemosensation, Morphogen, Innate Defense and Barriers), a category was constructed by collecting all RefGene names with applicable prefixes, listed in supplemental methods (DeFranco et al. 2007). GC content distribution was plotted as percent of promoters of each functional category in 3%GC bins (26-28%, 29-31%, etc). For figure 2D, Chemosensory/Defense/Xenobiotic and Cell Cycle/Transcription Factor/Morphogen categories were combined by averaging the three

percentages at each GC content to give equal weight to categories with varying numbers of constituent genes. Fig. S1 shows each functional distribution individually.

| <b>Chemosensation</b> | <b>Innate Defense / Barrier</b> |        | <b>Morphogen</b> |
|-----------------------|---------------------------------|--------|------------------|
| V1r                   | Clec                            | Skint  | Wnt              |
| V2r                   | Def                             | Spr    | Fgf              |
| Vmn1r                 | Ifn                             | Tlr    | Bmp              |
| Vmn2r                 | Klr                             | Lman   | Tgf              |
| Fpr                   | Krt                             | Marco  | Shh              |
| Olfr                  | Krtap                           | Mbl    | Dhh              |
| Tas1r                 | Lce                             | Apobec | Ihh              |
| Tas2r                 | Ms4                             | C1     | Egf              |
| Taar                  | Muc                             | Colec  | Egfr             |
|                       | Nirp                            | Masp   | Fgfr             |
|                       | Reg                             | Cd14   | Bmpr             |
|                       | Serpin                          | Fc     |                  |
|                       | Cd36                            |        |                  |

CLOWNEY\_Figure S1

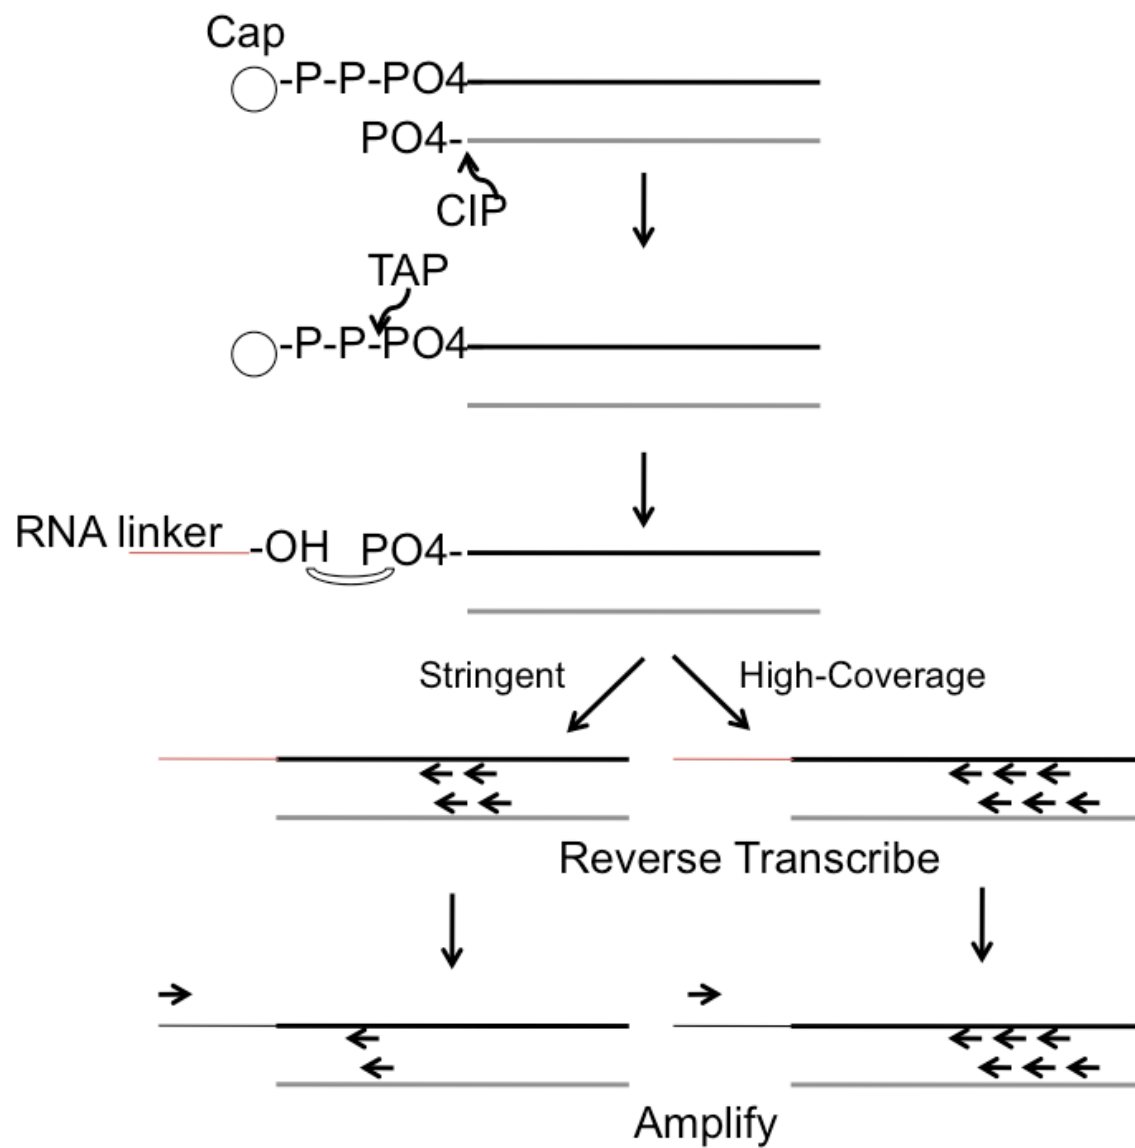**Figure S1. Schematic of RLM-RACE method used for promoter mapping**

Adapted from Michaeloski et al., 2006.

CLOWNEY\_Figure S2

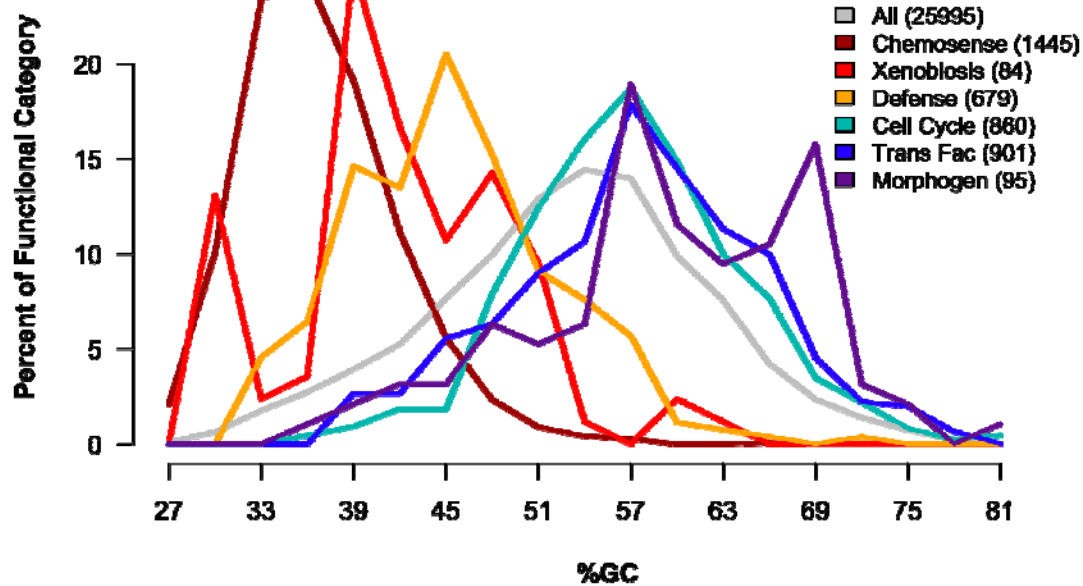

**Figure S2 Percent GC distribution of functional gene categories.** %GC distribution (in 3% bins) of promoters is shown as percentage of total promoters in the functional category. For category definitions, see methods. Number of promoters in each category is shown in the legend. "All" (from which functional categories are sampled) does not violate normality hypothesis (Anderson-Darling test, p-value of non-normality hypothesis  $>.05$ ); means of pairs of categories are all significantly different ( $p < .0001$  except Morphogen vs Cell Cycle  $= .004$ , Morphogen vs Transcription Factor  $= .025$ ; 2-tailed, unpaired t-test) except Defense vs. Xenobiosis and Cell Cycle vs. Transcription Factor.

CLOWNEY\_Figure S3

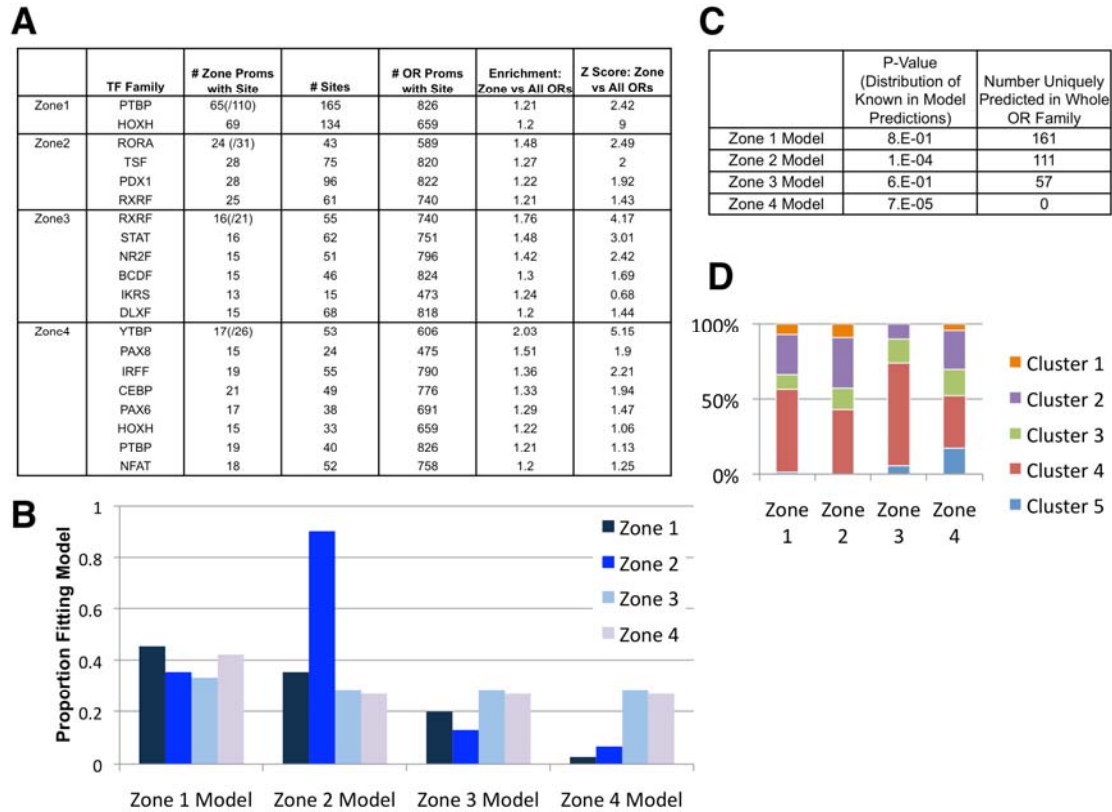

**Figure S3 Weak zonal promoter models based on TFBS.** 98 class 2 and 100 class 1 ORs with known zone were searched for TFBS enriched relative to all OR promoters after repeat-masking (A). Motifs listed are present in greater than half the promoters for a particular zone and enriched at least 20% over all OR promoters. We created zonal models by selecting promoters from the whole 1085 set that contained every enriched site for a particular zone in (A) and then checked the distribution of promoters with known zone in these model-predicted groups (B). Only models for zones 2 and 4 deviated significantly from random distribution (C), and only the zone 2 model can correctly re-identify the promoters used to build it. (D) Promoters with known zone were clustered by this method using various parameters. No parameter set was found under which promoters of a particular zone clustered coherently. One representative trial is shown.

CLOWNEY\_Figure S4

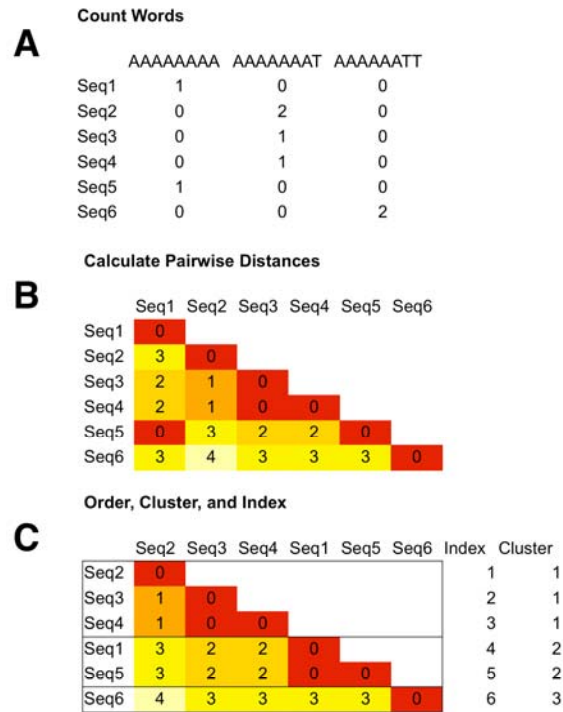

**Figure S4: Word-based clustering model of promoter relatedness.** (A) First, the procedure builds a dictionary of k-mers present in each input sequence and the number of times they occur. We worked with 8-mers. Reverse complements can be collapsed in this stage. (B) Next, the wordcounts for each sequence are compared to each other sequence to generate a pairwise distance matrix. Here, higher numbers (and lighter shades) correspond to greater differences between sequences. For speed, we calculated distances using only the most common words in the whole set of sequences. (C) Finally, sequences are ordered and clustered according to the distance matrix, so that more similar sequences are close together. Distance measures and ordering/clustering were performed using the R implementation of the Hopach package. The wordcount function was written in Perl.



CLOWNEY\_Table S1

| Gene Family | Description                                     | # Observed | # Total | Enrichment | P Value | Mean %GC |
|-------------|-------------------------------------------------|------------|---------|------------|---------|----------|
| Olfr        | Olfactory receptor                              | 846        | 1085    | 7.5        | 0.E+00  | 37       |
| V1r/Vmn1r   | Vomernasal receptor                             | 115        | 115     | 9.6        | 3.E-218 | 36       |
| V2r/Vmn2r   | Vomernasal receptor                             | 117        | 140     | 8.1        | 1.E-177 | 36       |
| Prl         | Prolactin                                       | 27         | 27      | 9.6        | 1.E-52  | 37       |
| Klr         | Killer cell receptor                            | 24         | 30      | 7.7        | 6.E-36  | 38       |
| Tas2r       | Taste receptor                                  | 25         | 37      | 6.5        | 4.E-30  | 36       |
| Skint       | Selection and upkeep of intraepithelial T-cells | 11         | 11      | 9.6        | 2.E-22  | 35       |
| Pcdh        | Protocadherin                                   | 27         | 66      | 3.9        | 4.E-16  | 44       |
| Csn         | Casein                                          | 5          | 5       | 9.6        | 5.E-11  | 34       |
| Amy         | Amylase                                         | 5          | 5       | 9.6        | 5.E-11  | 36       |
| Spr         | Small proline rich region                       | 9          | 15      | 5.8        | 3.E-10  | 41       |
| Fpr         | Formyl peptide receptor                         | 5          | 6       | 8.0        | 5.E-09  | 38       |
| Ifn         | Interferon                                      | 10         | 21      | 4.6        | 2.E-08  | 45       |
| Reg         | Regenerating islet derived                      | 5          | 7       | 6.9        | 1.E-07  | 40       |
| Adam        | A disintegrin and metalloprotease domain        | 11         | 30      | 3.5        | 2.E-06  | 47       |
| Crisp       | Cysteine-rich secretory protein                 | 3          | 4       | 7.2        | 2.E-05  | 34       |
| Hbb         | Hemoglobin                                      | 3          | 4       | 7.2        | 2.E-05  | 41       |
| Taar        | Trace amine receptor                            | 6          | 15      | 3.9        | 2.E-04  | 40       |
| Akr1        | Aldo-keto reductase                             | 6          | 15      | 3.9        | 2.E-04  | 44       |
| Tmprss      | Transmembrane serine protease                   | 6          | 15      | 3.9        | 2.E-04  | 47       |
| Sult        | Sulfotransferase                                | 5          | 12      | 4.0        | 4.E-04  | 45       |
| Ugt         | UDP glucuronosyltransferase                     | 7          | 21      | 3.2        | 6.E-04  | 43       |
| Mrg         | MAS-related GPR                                 | 6          | 18      | 3.2        | 1.E-03  | 44       |
| Cyp2        | Cytochrome p450 family 2                        | 12         | 50      | 2.3        | 2.E-03  | 46       |

|              |                                           |             |              |     |        |           |
|--------------|-------------------------------------------|-------------|--------------|-----|--------|-----------|
| Mup          | Major urinary protein                     | 5           | 14           | 3.4 | 2.E-03 | 41        |
| Krtap        | Keratin-associated protein                | 9           | 40           | 2.2 | 1.E-02 | 45        |
| Serpin       | Serine protease inhibitor                 | 12          | 60           | 1.9 | 1.E-02 | 46        |
| Nlrp         | NACHT, LRR and PYD containing protein     | 5           | 20           | 2.4 | 3.E-02 | 44        |
| Def          | Defensin                                  | 6           | 53           |     |        | 45        |
| Clec         | C-type lectin                             | 5           | 31           |     |        | 46        |
| Tas1r        | Taste receptor                            | 0           | 3            |     |        | 54        |
| All          | All families above                        | 1338        | 1975         |     |        | 41.5      |
| <b>Total</b> | <b>Unique Murine Gene Names (RefGene)</b> | <b>2206</b> | <b>21281</b> |     |        | <b>53</b> |

**Table S1. Gene families enriched in AT-rich promoters.** Families enriched ( $p < .05$ , Chi-square test) in the  $\leq 40\%$ GC group as compared to expected random representation of 10.4% of each family (2206/21281 unique RefGene names). “Enrichment” is (# Observed)/(# Expected). Some categories (e.g. Def, Clec) were not significantly enriched in the  $\leq 40\%$  category but still have a skewed mean distribution. Chemosensory families are shaded blue, defense and barriers shaded pink, xenobiotic metabolism shaded green, misc unshaded. Genes without mapped transcription start sites were not excluded.

CLOWNEY\_Table S2

| <b>Gene Family</b>       | <b>Mouse</b> | <b>Human</b> | <b>Zebrafish</b> | <b>Reference</b>                                 |
|--------------------------|--------------|--------------|------------------|--------------------------------------------------|
| <b>OR</b>                | 1391 (328)   | 802 (414)    | 176 (21)         | Nei et al.<br>2008                               |
| <b>V1R</b>               | 308 (121)    | 120 (115)    | 2 (0)            | Nei et al.<br>2008                               |
| <b>V2R</b>               | 279 (158)    | 20 (20)      | 52 (8)           | Nei et al.<br>2008                               |
| <b>Krtap</b>             | 188 (13)     | 122 (21)     | 0                | Wu et al.<br>2008                                |
| <b>Defensin</b>          | 94 (22)      | 66 (13)      | 3                | Zou et al.<br>2007                               |
| <b>Cyp2-4 (Unstable)</b> | 92 (55)      | 165 (87)     | 63 (14)          | Nelson et al.<br>2009,<br>Thomas et al.<br>2007  |
| <b>Pcdh</b>              | 65 (2)       | 70 (3)       | 58               | Wu et al.<br>2005                                |
| <b>Serpin</b>            | 61 (3)       | 38 (1)       | 15               |                                                  |
| <b>Mup</b>               | 43 (22)      | 1 (1)        | 0                | Logan et al.<br>2008                             |
| <b>T2R</b>               | 41 (6)       | 36 (11)      | 4 (0)            | Nei et al.<br>2008                               |
| <b>Klr</b>               | 35           | 0            | 0                | DeFranco et<br>al. 2007,<br>Yoder et al.<br>2009 |
| <b>Ifn</b>               | 34 (6)       | 34 (11)      | 4                | Zou et al.<br>2007                               |
| <b>Cyp1, 5+ (stable)</b> | 30           | 24           | 39               | Nelson et al.<br>2009,<br>Thomas et al.<br>2007  |
| <b>Prl</b>               | 27 (2)       | 1            | 2                | Simmons et<br>al. 2008                           |
| <b>TAAR</b>              | 16 (1)       | 9 (3)        | 119 (10)         | Nei et al.<br>2008                               |

|            |        |        |        |                      |
|------------|--------|--------|--------|----------------------|
| <b>Ugt</b> | 26 (4) | 30 (8) | 45 (5) | Huang et al.<br>2010 |
| <b>Csn</b> | 5      | 2      | 0      |                      |
| <b>T1R</b> | 3      | 3      | 1      | Nei et al.<br>2008   |

**Table S2. Size of gene families of interest in mouse, human and zebrafish.** Vega and UCSC annotations and papers of interest were searched for family members (number of which are pseudogenes in parentheses) (Aherst et al. 2005; Hinrichs et al. 2006). Pcdh and Ugt families produce diverse gene products by alternative splicing and have undergone differential expansion of subfamilies in mammal vs. fish lineage (Wu 2005; Huang and Wu 2010). Klr (aka Ly49) genes in mice are functionally similar to KLR genes in human and N1TR genes in fish but do not share evolutionary ancestry (DeFranco et al. 2007; Yoder 2009). Numbers differ from counts of RefGene prefixes used in other analyses.

CLOWNEY Table S3

|                      | Olfr | Non-Olfr | P value of improvement over previous filter |
|----------------------|------|----------|---------------------------------------------|
| Unfiltered           | 1040 | ~21000   |                                             |
| TK20                 | 996  | 1048     | ~0                                          |
| TK20 + AT-rich       | 682  | 253      | $1 \times 10^{-49}$                         |
| TK20 + AT-rich + O/E | 392  | 110      | $1 \times 10^{-2}$                          |

**Table S3. Numbers of Olfr and non-Olfr promoters fitting model.** Total genes passing each filter described in Figure 3C-D. P values are observed proportion of Olfr and non-Olfr genes passing the filter vs expected random distribution; ATrich and O/E filter P values are calculated based on improvement of the previous filter, not based on enrichment vs. no filtering.

CLOWNEY\_Table S4

| Family | Type I Enrichment | Type II Enrichment | All OR promoter enrichment |
|--------|-------------------|--------------------|----------------------------|
| PAX1   | 1.16              | .76                | .81                        |
| NBRE   | 1.13              | .84                | .89                        |
| GABF   | .85               | 1.27               | 1.19                       |

**Table S4. Genomatix TFBS differentially enriched in Type I and Type II OR promoters**

CLOWNEY\_Table S4

| Matrix Family | Most Express-ed         |        |                      | Least Express-ed        |        |                      | Most/Least |
|---------------|-------------------------|--------|----------------------|-------------------------|--------|----------------------|------------|
|               | # Seq with Site (of 51) | # Site | Promoter Enrich-ment | # Seq with Site (of 53) | # Site | Promoter Enrich-ment |            |
| BRNF          | 50                      | 601    | 2.47                 | 53                      | 570    | 2.26                 | 1.09       |
| ARID          | 43                      | 141    | 2.52                 | 45                      | 115    | 1.98                 | 1.27       |
| DLXF          | 44                      | 202    | 2.60                 | 44                      | 159    | 1.97                 | 1.32       |
| LHXF          | 49                      | 560    | 2.53                 | 52                      | 493    | 2.14                 | 1.18       |
| NKX6          | 47                      | 220    | 2.31                 | 52                      | 206    | 2.08                 | 1.11       |
| BRN5          | 49                      | 376    | 2.59                 | 51                      | 329    | 2.18                 | 1.19       |
| CART          | 49                      | 427    | 2.36                 | 52                      | 388    | 2.07                 | 1.14       |
| PDX1          | 43                      | 183    | 2.63                 | 46                      | 145    | 2.01                 | 1.31       |
| HBOX          | 51                      | 425    | 2.26                 | 53                      | 383    | 1.96                 | 1.15       |
| CDXF          | 50                      | 167    | 2.13                 | 48                      | 166    | 2.04                 | 1.04       |
| OCT1          | 51                      | 622    | 2.25                 | 53                      | 623    | 2.17                 | 1.04       |
| HOXF          | 50                      | 496    | 2.02                 | 52                      | 503    | 1.97                 | 1.03       |
| MEF2          | 42                      | 128    | 1.86                 | 47                      | 148    | 2.07                 | 0.90       |
| VTBP          | 51                      | 391    | 2.13                 | 53                      | 322    | 1.69                 | 1.26       |
| SATB          | 36                      | 117    | 3.75                 | 41                      | 100    | 3.09                 | 1.21       |
| PIT1          | 45                      | 181    | 2.93                 | 38                      | 136    | 2.12                 | 1.38       |
| ATBF          | 38                      | 123    | 3.09                 | 43                      | 89     | 2.15                 | 1.44       |
| PAXH          | 33                      | 113    | 2.56                 | 33                      | 100    | 2.18                 | 1.17       |
| NKX1          | 37                      | 105    | 2.72                 | 27                      | 70     | 1.75                 | 1.55       |
| HNF1          | 36                      | 75     | 1.35                 | 44                      | 137    | 2.37                 | 0.57       |

**Table S4. Genomatix TFBS enrichment in promoters of 5% most expressed and 5% least expressed OR genes by RNASeq in OMP+ neurons**

Supplemental References:

- Ashurst JL et al. 2005. The Vertebrate Genome Annotation (Vega) database. *Nucleic Acids Res* **33**, D459-65.
- DeFranco AL, Locksely R, Roberston M. 2007. *Immunity: The Immune Response in Infectious and Inflammatory Disease*, 350 (Oxford University Press, Oxford, UK).
- Hinrichs, AS et al. 2006. The UCSC Genome Browser Database: update 2006. *Nucleic Acids Res* **34**, D590-8.
- Huang H, Wu Q. 2010. Cloning and comparative analyses of the zebrafish Ugt repertoire reveal its evolutionary diversity. *PLoS One* **5**, e9144.
- Logan DW, Marton TF, Stowers L. 2008. Species specificity in major urinary proteins by parallel evolution. *PLoS One* **3**, e3280.
- Nei M, Niimura Y, Nozawa M. 2008. The evolution of animal chemosensory receptor gene repertoires: roles of chance and necessity. *Nat Rev Genet* **9**, 951-63.
- Nelson DR. 2009. The cytochrome p450 homepage. *Hum Genomics* **4**, 59-65.
- Simmons DG, Rawn S, Davies A, Hughes M, Cross JC. 2008. Spatial and temporal expression of the 23 murine Prolactin/Placental Lactogen-related genes is not associated with their position in the locus. *BMC Genomics* **9**, 352.
- Thomas JH. 2007. Rapid birth-death evolution specific to xenobiotic cytochrome P450 genes in vertebrates. *PLoS Genet* **3**, e67.
- Wu DD, Irwin DM, Zhang YP. 2008. Molecular evolution of the keratin associated protein gene family in mammals, role in the evolution of mammalian hair. *BMC Evol Biol* **8**, 241.
- Wu Q. 2005. Comparative genomics and diversifying selection of the clustered vertebrate protocadherin genes. *Genetics* **169**, 2179-88.
- Zou J, Mercier C, Koussounadis A, Secombes C. 2007. Discovery of multiple beta-defensin like homologues in teleost fish. *Mol Immunol* **44**, 638-47.
- Yoder JA. 2009. Form, function and phylogenetics of NITRs in bony fish. *Dev Comp Immunol* **33**, 135-44.
- Zou J, Tafalla C, Truckle J, Secombes CJ. 2007. Identification of a second group of type I IFNs in fish sheds light on IFN evolution in vertebrates. *J Immunol* **179**, 3859-71.
